# Supplementary material for: Everyday social influence and political consumerism
Source: Research Square preprint supplement (doi:10.21203/rs.3.rs-8743711/v1), 2026-02-17
Supplement: Supplementary file 1 [file 04d339a491b2a4c6d25c8dbe.docx]

**Supplementary Material**

**Table S1**

Original questions from the Swedish survey

| Hur ofta har följande inträffat under de senaste 12 månaderna? | | | | | | | |
| --- | --- | --- | --- | --- | --- | --- | --- |
|  | Aldrig | Någon gång de senaste 12 mån | Någon gång i halvåret | Någon gång i månaden | Någon gång i veckan | Flera gånger i veckan | Varje dag |
| 1. Jag har köpt mat eller andra varor av ekologiska eller etiska skäl |  |  |  |  |  |  |  |
| 1. Jag har bojkottat mat eller andra varor av ekologiska eller etiska skäl |  |  |  |  |  |  |  |
| Hur ofta har följande personer påverkat dig att köpa mer mat eller andra varor av ekologiska eller etiska skäl under de senaste 12 månaderna? | | | | | | | |
|  | Aldrig | Någon gång de senaste 12 mån | Någon gång i halvåret | Någon gång i månaden | Någon gång i veckan | Flera gånger i veckan | Varje dag |
| 1. Make/sambo/partner |  |  |  |  |  |  |  |
| 1. Föräldrar |  |  |  |  |  |  |  |
| 1. Syskon |  |  |  |  |  |  |  |
| 1. Mor-/farföräldrar |  |  |  |  |  |  |  |
| 1. Barn/barnbarn |  |  |  |  |  |  |  |
| 1. Vän |  |  |  |  |  |  |  |
| 1. Influencer på social media |  |  |  |  |  |  |  |
| 1. Kändis (ej influencer) |  |  |  |  |  |  |  |
| 1. Forskare |  |  |  |  |  |  |  |
| 1. Journalist/författare |  |  |  |  |  |  |  |
| 1. Politiker |  |  |  |  |  |  |  |
| 1. Annan person |  |  |  |  |  |  |  |

**Table S2**

Descriptive statistics of buycotting and boycotting (by sex and in total).

|  | Sex *(in percent)* | | |
| --- | --- | --- | --- |
|  | Woman | Man | Total |
| Buycotted |  |  |  |
| Never | 21.81 | 35.67 | 28.49 |
| Sometime in the past 12 months | 8.67 | 9.05 | 8.86 |
| Once every six months | 5.99 | 6.72 | 6.35 |
| Once a month | 17.86 | 14.81 | 16.39 |
| Once a week | 22.07 | 15.09 | 18.70 |
| Several times a week | 17.22 | 14.27 | 15.80 |
| Daily | 6.38 | 4.39 | 5.42 |
|  |  |  |  |
| Total | 100.00 | 100.00 | 100.00 |

|  | Sex *(in percent)* | |  |
| --- | --- | --- | --- |
|  | Woman | Man | Total |
| Boycotted |  |  |  |
| Never | 46.13 | 58.42 | 52.07 |
| Sometime in the past 12 months | 13.05 | 12.09 | 12.59 |
| Once every six months | 7.60 | 6.66 | 7.15 |
| Once a month | 12.17 | 8.83 | 10.56 |
| Once a week | 7.73 | 7.34 | 7.54 |
| Several times a week | 6.59 | 2.99 | 4.85 |
| Daily | 6.72 | 3.67 | 5.25 |
|  |  |  |  |
| Total | 100.00 | 100.00 | 100.00 |

ss
